## GreA and GreB enhance *Escherichia coli* RNA polymerase transcription rate in a reconstituted transcription-translation system

Lea L. de Maddalena<sup>† 1</sup>, Henrike Niederholtmeyer<sup>† 1</sup>, Matti Turtola<sup>2</sup>, Zoe N. Swank<sup>1</sup>, Georgiy A. Belogurov<sup>2</sup>, and Sebastian J. Maerkl<sup>1\*</sup>

<sup>1</sup> Institute of Bioengineering, School of Engineering, École Polytechnique Fédérale de Lausanne, Lausanne, Switzerland

<sup>2</sup> Department of Biochemistry, University of Turku, Turku, Finland

<sup>†</sup> LLM and HN contributed equally to this work

\*Corresponding author: E-mail [Sebastian.maerkl@epfl.ch](mailto:Sebastian.maerkl@epfl.ch)

### Abstract:

Cell-free environments are becoming viable alternatives for implementing biological networks in synthetic biology. The reconstituted cell-free expression system (PURE) allows characterization of genetic networks under defined conditions but its applicability to native bacterial promoters and endogenous genetic networks is limited due to the poor transcription rate of *Escherichia coli* RNA polymerase in this minimal system. We found that addition of transcription elongation factors GreA and GreB to the PURE system increased transcription rates of *E. coli* RNA polymerase from sigma factor 70 promoters up to 6-fold. Furthermore, we reconstituted activation of natural *E. coli* promoters controlling flagella biosynthesis by the transcriptional activator FlhDC and sigma factor 28. Addition of GreA/GreB to the PURE system allows efficient expression from natural and synthetic *E. coli* promoters and characterization of their regulation in minimal and defined reaction conditions making the PURE system more broadly applicable to study genetic networks and bottom-up synthetic biology.

**Keywords:** *E. coli* RNA polymerase, transcription, cell-free protein synthesis, *E. coli* promoters, PURE system, bottom-up synthetic biology

## Graphical abstract

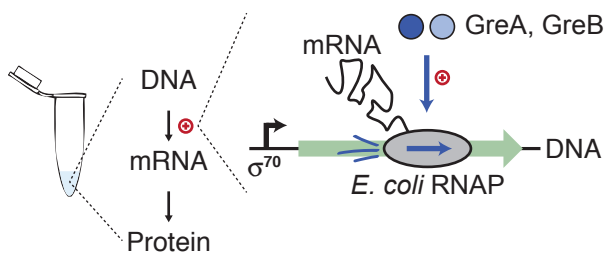

## Introduction

Diverse biological processes can be reconstituted and studied *in vitro* using purified proteins or lysates. This approach has facilitated fundamental discoveries in molecular biology and biochemistry, such as DNA replication<sup>1</sup> and translation of the genetic code<sup>2</sup>. The cell-free approach allows construction of systems that would be difficult or impossible to develop *in vivo* and to perform measurements and experiments that are difficult to conduct in cells. Apart from basic research on biological networks, applications of *in vitro* systems thus far have include biosensors and molecular synthesis<sup>3-5</sup>. *E. coli* cell-lysate transcription and translation (TX-TL) systems have become popular to engineer and study genetic networks of increasing complexity<sup>6-10</sup>. Cell-lysate-based TX-TL systems produce high protein yields and allow transcription from native *E. coli* promoters<sup>11</sup>. However, lysates have the disadvantage that they contain almost all the proteins and macromolecules present in the cytoplasm at the moment of lysis. For bottom-up synthetic biology and reconstitution studies this is not ideal because the lysate still contains many unknown components and uncontrollable variables.

An appealing transcription and translation system that is commercially available as PURExpress (PURE), is reconstituted from purified components and allows experiments under minimal and defined conditions<sup>12</sup>. This reconstituted system contains T7 RNA polymerase (RNAP), purified ribosomes, all necessary translation factors from *E. coli*, tRNAs, enzymes for tRNA aminoacylation and energy regeneration, creatine phosphate as an energy source, and nucleotides and amino acids as precursors. Various genetic networks can be implemented in this system, which to date mostly relied on single subunit phage RNA polymerases for transcription<sup>13</sup>.

Transcription by the multisubunit *E. coli* RNA polymerase (EcRNAP) has been reconstituted in the PURE system and can be implemented by either adding the purified holoenzyme to the reaction mix or by co-expressing its subunits<sup>14,15</sup>. While transcription rates of the EcRNAP in PURE depend on the concentrations of DNA template and EcRNAP, they are generally considerably lower than for phage polymerases. For example, we observed roughly an order of magnitude lower mRNA concentrations synthesized from a consensus sequence sigma factor 70 ( $\sigma 70$ ) promoter by EcRNAP than by phage T3 RNAP<sup>13</sup> under similar conditions. *In vivo* elongation rates of EcRNAP range between 28 and 89nt/s<sup>16</sup> and are comparable to the values reported for T7 RNAP *in vitro*<sup>17,18</sup>. Transcription elongation factors affect EcRNAP transcription elongation rate either by sensitizing or suppressing RNAP pausing. Elongating RNAP frequently backtracks along the DNA forming a transcriptionally inactive state. Transcription elongation factors GreA and GreB bind to backtracked RNAP

and catalyze the endonucleolytic cleavage of nascent RNA within the RNAP active site allowing transcription to continue<sup>19</sup>. GreA resolves smaller backtracking events by cleaving 2-3 nt from the 3' end of the RNA, whereas GreB can also rescue longer backtracked complexes<sup>20</sup>. GreA and GreB are known to increase transcription elongation rate and stimulate promoter escape in a subset of promoters<sup>19-22</sup>, but GreA and GreB transcription elongation factors are not present in the PURE system.

Here we show that *E. coli* transcription elongation factors GreA and GreB enhance EcRNAP transcription rates in the PURE system up to 6-fold to reach the rate of T7 RNAP transcription in the system. We go on to show that an increase in transcription rates can be observed for several different synthetic and natural  $\sigma 70$  *E. coli* promoters. Furthermore, we used the enhanced system to study natural *E. coli* promoters involved in flagella biosynthesis and their activation by two different transcriptional activators *in vitro*, under defined conditions.

## Results and discussion

EcRNAP can be added to the PURE system to allow transcription of DNA templates carrying *E. coli* promoters<sup>14,15</sup> but mRNA synthesis and subsequent protein production is more efficient using phage polymerases such as T7 or T3 RNAP<sup>13</sup>. In bacterial cells multiple proteins can increase RNAP activity, which are not present in the minimal PURE system. The transcription elongation factors GreA and GreB from *E. coli* increase overall transcription elongation rates and stimulate promoter escape in a subset of promoters by re-activating backtracked elongation complexes<sup>19-22</sup>. We added transcription elongation factors GreA and GreB to a PURE reaction containing EcRNAP with  $\sigma 70$  (holoenzyme) and a DNA template expressing EGFP under control of a consensus sequence *E. coli*  $\sigma 70$  promoter. We measured concentrations of full-length mRNA using fluorescent FRET probes that bind to a target region at the 3' end of the mRNA<sup>23</sup> (Fig. 1A) and found that in the presence of GreA and GreB mRNA concentrations increased faster and to higher concentrations than without the elongation factors (Figure 1). The transcription rate increase mediated by GreA and GreB followed hyperbolic kinetics and plateaued at concentrations above 5  $\mu$ M for both GreA and GreB. At the plateau GreA and GreB increased transcription rates about 3-fold and final EGFP protein synthesized about 2-fold for the DNA template concentration tested (Fig. 1B, C). When GreA and GreB were added in combination, we did not observe a significant synergistic effect on mRNA or protein synthesis (Supplementary Fig. 1). We nonetheless used both proteins in an enhanced PURE (ePURE) reaction containing 10  $\mu$ M of GreA and 10  $\mu$ M

of GreB in addition to the *E. coli* RNAP holoenzyme (0.2  $\mu$ M EcRNAP, 1  $\mu$ M  $\sigma$ 70) for all subsequent experiments. Apart from these protein additions we did not further modify the commercial PURE system (see Materials and Methods). During a TX-TL reaction in ePURE we observed up to 10-fold higher mRNA concentrations, which also translated to an increased EGFP synthesis (Fig. 1D, E).

By testing various DNA template concentrations we observed an up to 6-fold increase of transcription rate in ePURE compared to a PURE reaction supplemented with *E. coli* RNAP holoenzyme alone (Fig. 2A). Increased mRNA synthesis led to 3-fold higher final EGFP levels, and the advantage of using the ePURE reaction was strongest for lower DNA template concentrations (Fig. 2B). In the ePURE system we observed comparable mRNA and EGFP synthesis from an *E. coli*  $\sigma$ 70 promoter and a T7 RNAP promoter (Fig. 2). The ePURE improvement should thus facilitate using *E. coli* RNAP for transcription under defined conditions.

We next asked whether GreA and GreB can improve transcriptional elongation rates for genes other than EGFP. In order to test this, we measured synthesis of full-length mRNA from two additional genes: *asr* (309 bp), and *chiP* (1407 bp) which are roughly half and twice as long as the EGFP gene (717 bp), respectively. Transcription rates of both genes were increased in the ePURE system in the presence of GreA and GreB (Supplementary Fig. 2). In the non-optimized PURE system transcription rates were below the detection limit for the longer gene and increased to measurable levels in the presence of GreA and GreB. The transcription rate of the shorter gene increased 8-fold (Supplementary Fig. 2).

In order to determine if the ePURE system also increases the transcription rate for promoters other than the strong  $\sigma$ 70tet promoter we characterized in Figures 1 and 2, we tested the system on 16 additional synthetic and natural  $\sigma$ 70 promoters (Fig. 3). The panel was composed of nine constitutive promoters from the registry of standard biological parts (<http://parts.igem.org>), the BBa\_J231xx-series, which are well-characterized *in vivo* and *in vitro*<sup>24-26</sup>, two constitutive promoters *proC* and *proD*<sup>27</sup>, several natural repressible promoters (promoter of the *trp* operon, *lac* UV5 promoter, the phage  $\lambda$ <sub>PR</sub> promoter), and three synthetic repressible promoters ( $P_{tet}^{28}$ , and the  $\sigma$ 70 consensus sequence promoters  $P_{\sigma70lac}$  and  $P_{\sigma70tet}^{13}$ ). In the ePURE system EGFP synthesis increased for 14 of the 17 promoters we characterized (Fig. 3A). Our results on the constitutive J231xx-promoters compare well with relative promoter strengths measured in lysate-based TX-TL reactions<sup>25,26</sup>. We found that the presence of GreA and GreB in the ePURE system enhanced expression particularly for strong promoters. These results suggest that at least for strong promoters transcriptional pausing

during elongation severely limited transcription by EcRNAP in the PURE system. However, we cannot rule out effects on initiation of transcription as it has been shown that GreA and GreB can influence promoter escape differently for different promoters<sup>22</sup>. By increasing the range of synthesis rates that can be attained with *E. coli* promoters the ePURE system will be useful in implementing and characterizing genetic networks based on native *E. coli* promoters.

We next tested whether the ePURE system would allow us to study an endogenous bacterial genetic network and chose to analyze transcriptional regulation of native *E. coli* flagellar promoters. Two main regulators, the FlhDC transcriptional activator and FliA, the flagellar sigma factor,  $\sigma 28$ , are thought to activate the genes in a tightly controlled temporal order<sup>29,30</sup>. FlhDC is known as the master regulator and activates  $\sigma 70$ -dependent transcription from class 2 promoters. One of the genes FlhDC activates is *fliA* coding for  $\sigma 28$ , which then activates itself and other genes in a positive autoregulation<sup>31</sup>. Many of the more than 50 genes in the flagellar regulon, which are divided into at least 17 operons, are transcribed from multiple promoters, and can be activated by both FlhDC and  $\sigma 28$ <sup>29,32</sup>. Their regulation has been studied extensively *in vivo* using genetics and promoter fusions<sup>29,30,32</sup>. In a complementary approach, this complex regulatory system can also be studied *outside of cells*, under reaction conditions that eliminate unknown factors. Activation of several flagellar class 2 and class 3 promoters by FlhDC and  $\sigma 28$  was shown by *in vitro* transcription experiments<sup>31,33,34</sup> and binding of the FlhDC activator to putative promoters was demonstrated by *in vitro* binding assays<sup>35</sup>.

We analyzed eight flagellar promoters coupled to an EGFP reporter in the ePURE system and show their activation by FlhDC and  $\sigma 28$  in the defined TX-TL system (Fig. 4A). We based our expectations on the EcoCyc *E. coli* database<sup>36</sup>, which contains information on experimentally known and bioinformatically predicted transcriptional activation. To synthesize our DNA templates we fused 150 to 250 bp long promoter regions that contained the annotated  $\sigma 70$  and  $\sigma 28$  promoters as well as FlhDC binding sites to identical, strong ribosomal binding sites followed by the EGFP reporter gene. To test their activation, we separately pre-synthesized the FlhDC and the  $\sigma 28$  activators and then added these to an ePURE reaction containing GreA, GreB, EcRNAP, and a DNA template with the respective flagellar promoters.

All eight promoters tested showed no detectable activity in the absence of FlhDC and  $\sigma 28$ . When the reaction contained either of the two activators, we observed the expected activation pattern with widely differing promoter strengths (Fig. 4A). Both activators in

combination generally did not improve expression compared to only one activator. Most of the time the presence of both activators even led to decreased expression. We attribute this effect to competition between both activators for binding to DNA<sup>31</sup> and to the RNAP core enzyme, which binds  $\sigma 28$  with a higher affinity than  $\sigma 70$ <sup>34</sup>. We hypothesize that concentrations of EcRNAP and activators might be different in cells than in our *in vitro* assay, which could explain why the promoters did not show additive activation as observed *in vivo*<sup>32</sup>. When considering activation by a single activator, two out of eight promoters, *fliE* and *flgK*, deviated from the annotated regulation pattern in EcoCyc. The *fliE* promoter was predicted to be activated by both  $\sigma 28$ <sup>37</sup> and FlhDC<sup>35</sup> but we only detected low activation by FlhDC. For the *flgK* promoter only activation by  $\sigma 28$  was annotated on EcoCyc and previously shown<sup>34</sup>. We observed strong activation by  $\sigma 28$  but also a low but significant activation by FlhDC. A computational search for FlhDC did not identify a FlhDC binding site upstream of the *flgK* gene in *E. coli*<sup>35</sup>. In *Salmonella typhimurium*, however, transcription of *flgK* is activated by both  $\sigma 70$ /FlhDC and  $\sigma 28$ <sup>38</sup>. Additionally, our study provides experimental evidence for activation of several promoters by FlhDC and  $\sigma 28$ , which have previously only been predicted computationally, such as activation of *flgB*, *fliE* and *fliD* by FlhDC<sup>35</sup> and *flgM* by  $\sigma 28$ <sup>39</sup>. Thus, our analysis of flagellar promoters in defined conditions demonstrates that native gene activation mechanisms can be studied using the ePURE system. The finding that FlhDC is a strong transcriptional activator for a number of different promoters should furthermore be useful for the assembly of synthetic genetic networks.

Using the genes for FlhDC and  $\sigma 28$  and two promoters that showed activation by both activators, we built a synthetic gene network (Fig. 4B), which was implemented and characterized in a microfluidic nano-reactor device<sup>13</sup>. T7 RNAP transcribes the genes coding for FlhD and FlhC. FlhDC then activates  $\sigma 70$  *E. coli* RNAP to express the Citrine reporter, which we placed under control of the *flgK* promoter. A control reaction, which did not contain the FlhD and FlhC DNA templates, again demonstrated activation of the *flgK* promoter by the FlhDC activator (Fig. 4C). Transiently we added DNA templates carrying the *fliA* gene ( $\sigma 28$ ) and a Cerulean reporter gene, both under control of the *fliA* promoter, which leads to positive autoregulation of  $\sigma 28$ .  $\sigma 28$  further activates both reporters leading to a fluorescence increase of Citrine and Cerulean in the presence of the *fliA* and Cerulean templates (Fig. 4C). This 5-gene network demonstrates that complex genetic networks dependent on the *E. coli* RNAP and native *E. coli* promoters can be assembled in the ePURE system.

*E. coli* promoters offer a wide and well-characterized repertoire of promoter-regulator pairs and *E. coli* promoters are also highly modular<sup>40</sup> making transcription by *E. coli* RNAP

interesting for *in vitro* synthetic biology<sup>11</sup>. While lysate-based TX-TL systems can be prepared with high activities of the EcRNAP<sup>11,41</sup>, we have found activity of the EcRNAP in the reconstituted PURE system to be too low for many applications. PURE is a minimal system that can be rationally improved by a bottom-up approach. Here we enhanced transcription in the PURE system by adding purified transcription elongation factors GreA and GreB, which indicates that transcriptional elongation was limiting performance of EcRNAP in the PURE system. Addition of GreA and GreB increased EcRNAP transcription rates from a strong  $\sigma 70$  promoter to levels observed with phage T7 RNAP and significantly increased transcription from a number of synthetic *E. coli* promoters of different strengths. We used the ePURE system to characterize activation of native *E. coli* flagellar promoters by the transcriptional activators FlhDC and  $\sigma 28$ , demonstrating that the ePURE system is useful for the characterization of genetic regulation under defined conditions. Inclusion of GreA and GreB proteins should furthermore be useful to increase protein yields in the PURE system when it is desirable to use *E. coli* promoters.

## Materials and Methods

### DNA template preparation

Linear DNA templates were produced by two-step PCR as described previously<sup>13,23</sup> using the primers listed in Table S1. Flagella promoters were PCR amplified from *E. coli* BL21(DE3) genomic DNA and replaced the 5' extension primer during two-step PCR. All linear DNA templates prepared for this study are listed in Table S2.

### Preparation of GreA, GreB and EcRNAP holoenzyme

EcRNAP subunits (expression plasmid pVS10) were co-expressed in *E. coli* Xjb(DE3) cells (Zymo Research, Irvine, CA, USA) and the  $\alpha_2\beta\beta'\omega$  assembly ( $\beta'$  subunit contained C-terminal His<sub>6</sub>-tag) was purified by a combination of immobilized-metal affinity, heparin and anion exchange chromatographies as described<sup>42</sup>. *E. coli*  $\sigma 70$  protein containing N-terminal His<sub>6</sub>-tag (expression plasmid pET28- $\sigma 70$ <sup>43</sup>) was expressed in *E. coli* Xjb(DE3) cells and purified by a combination of immobilized-metal affinity, heparin and anion exchange chromatographies as described for EcRNAP except that the lysis and the wash buffers during immobilized-metal affinity chromatography contained 1 M NaCl. *E. coli* GreA and GreB proteins containing C-terminal His<sub>6</sub>-tags (expression plasmids pIA578 and pIA577, respectively) were purified by immobilized-metal affinity chromatography followed by gel



filtration as described<sup>44</sup>. All proteins were dialyzed against the storage buffer (20 mM Tris-HCl pH 7.9, 150 mM NaCl (1M NaCl for GreA and GreB), 0.1 mM EDTA, 50% glycerol, 0.1 mM DTT) and stored at -20°C. A stock solution of 50x holoenzyme (1:5 *E. coli* core RNAP :  $\sigma 70$  factor at 10  $\mu$ M and 50  $\mu$ M) was prepared by incubating the proteins in storage buffer at 30°C for 20 min, then the stock was stored at -20°C until use.

### Batch reaction setup and measurements

TX-TL reactions were performed in the PURExpress *In Vitro* Protein Synthesis kit (New England Biolabs) supplemented with Protector RNase Inhibitor (Roche), 1  $\mu$ M Cy3 and Cy5 binary probes<sup>23</sup>, 200 nM *E. coli* core RNAP and 1  $\mu$ M  $\sigma 70$  factor. The ePURE system additionally contained 10  $\mu$ M of each GreA and GreB transcription elongation factors. Plater reader batch TX-TL reactions, and measurement of the mRNA concentration were performed as previously described<sup>23</sup>. The initial mRNA synthesis, or transcription rate (TX), was determined by fitting the mRNA concentration ( $m$ ) of the first 40 min of the reaction to:

$$m(t) = \frac{TX}{deg} * (1 + e^{-deg*t}),$$

where  $t$  is time and  $deg$  signifies the mRNA degradation rate (fixed at  $0.0085 \text{ min}^{-1}$ )<sup>23</sup>. The final EGFP concentration was determined at the plateau of the protein synthesis reaction.

To test activation of flagellar promoters by FlhDC and  $\sigma 28$ , we pre-synthesized the activators from T7 RNAP templates in a standard PURE reaction without EcRNAP and Gre proteins. FlhDC was produced by combining *flhD* and *flhC* templates at 10nM each, and  $\sigma 28$  was produced from 10 nM *fliA* template for 100 min at 37°C. The activators then were stored in aliquots at -80°C until use. These were prepared by combining the FlhDC and  $\sigma 28$  pre-synthesis reactions 1:1 for testing activation by both activators and by diluting 1:1 with Tris buffer for testing of each activator separately.

### Flagellar gene network in a nano-reactor device

We assembled the genetic network from 5 individual DNA templates. Final concentrations were 1 nM for  $P_{T7}$ -*flhD*, 2.5 nM for  $P_{flgK}$ -Citrine, and  $P_{T7}$ -*flhC*, and 2 nM for  $P_{fliA}$ -*fliA* and  $P_{fliA}$ -Cerulean. The templates  $P_{fliA}$ -*fliA* and  $P_{fliA}$ -Cerulean were only added transiently. The microfluidic chip was prepared and used as described<sup>13</sup> using a dilution time,  $t_d$ , of  $39.6 \pm 0.4$  min. Citrine and Cerulean concentrations were determined from a calibration with purified proteins<sup>10</sup>.

### Supporting Information

Supporting figures S1 and S1. Supporting tables S1 and S2.

## Author Information

Corresponding author: E-mail [Sebastian.maerkl@epfl.ch](mailto:Sebastian.maerkl@epfl.ch)

Author contributions: LLM and HN contributed equally to this work

## Acknowledgements

The authors would like to thank Irina Artsimovitch (Ohio State University) for providing expression plasmids for EcRNAP, GreA and GreB.

## References

- (1) Lehman, I. R., Bessman, M. J., Simms, E. S., and Kornberg, A. (1958) Enzymatic synthesis of deoxyribonucleic acid. I. Preparation of substrates and partial purification of an enzyme from *Escherichia coli*. *J. Biol. Chem.* *233*, 163–170.
- (2) Nirenberg, M., and Matthaei, J. (1961) The dependence of cell-free protein synthesis in *E. coli* upon naturally occurring or synthetic polyribonucleotides. *Proc Natl Acad Sci USA* *47*, 1588–1602.
- (3) Pardee, K., Green, A. A., Ferrante, T., Cameron, D. E., DaleyKeyser, A., Yin, P., and Collins, J. J. (2014) Paper-Based Synthetic Gene Networks. *Cell* 1–15.
- (4) Forster, A. C., and Church, G. M. (2006) Towards synthesis of a minimal cell. *Mol Syst Biol* *2*, 45.
- (5) Schwiile, P., and Diez, S. (2009) Synthetic biology of minimal systems. *Critical Reviews in Biochemistry and Molecular Biology* *44*, 223–242.
- (6) Noireaux, V., Bar-Ziv, R., and Libchaber, A. (2003) Principles of cell-free genetic circuit assembly. *Proc Natl Acad Sci USA* *100*, 12672–12677.
- (7) Shin, J., and Noireaux, V. (2012) An *E. coli* cell-free expression toolbox: application to synthetic gene circuits and artificial cells. *ACS Synth. Biol.* *1*, 29–41.
- (8) Karzbrun, E., Tayar, A. M., Noireaux, V., and Bar-Ziv, R. H. (2014) Programmable on-chip DNA compartments as artificial cells. *Science* *345*, 829–832.
- (9) Takahashi, M. K., Chappell, J., Hayes, C. A., Sun, Z. Z., Kim, J., Singhal, V., Spring, K. J., Al-Khabouri, S., Fall, C. P., Noireaux, V., Murray, R. M., and Lucks, J. B. (2015) Rapidly characterizing the fast dynamics of RNA genetic circuitry with cell-free transcription-translation (TX-TL) systems. *ACS Synth. Biol.* *4*, 503–515.
- (10) Niederholtmeyer, H., Sun, Z. Z., Hori, Y., Yeung, E., Verpoorte, A., Murray, R. M., and Maerkl, S. J. (2015) Rapid cell-free forward engineering of novel genetic ring oscillators. *Elife* *4*, 525.
- (11) Shin, J., and Noireaux, V. (2010) Efficient cell-free expression with the endogenous *E. Coli* RNA polymerase and sigma factor 70. *J. Biol. Eng.* *4*, 8–9.
- (12) Shimizu, Y., Inoue, A., Tomari, Y., Suzuki, T., Yokogawa, T., Nishikawa, K., and Ueda, T. (2001) Cell-free translation reconstituted with purified components. *Nat Biotechnol* *19*, 751–755.
- (13) Niederholtmeyer, H., Stepanova, V., and Maerkl, S. J. (2013) Implementation of cell-free biological networks at steady state. *Proc Natl Acad Sci USA* *110*, 15985–15990.
- (14) Asahara, H., and Chong, S. (2010) In vitro genetic reconstruction of bacterial transcription initiation by coupled synthesis and detection of RNA polymerase holoenzyme. *Nucleic Acids Res.* *38*, e141.

- (15) Zhou, Y., Asahara, H., Schneider, N., Dranchak, P., Inglese, J., and Chong, S. (2014) Engineering Bacterial Transcription Regulation To Create a Synthetic in Vitro Two-Hybrid System for Protein Interaction Assays. *J Am Chem Soc* 136, 14031–14038.
- (16) Vogel, U., and Jensen, K. F. (1994) The RNA chain elongation rate in Escherichia coli depends on the growth rate. *J Bacteriol* 176, 2807–2813.
- (17) Kim, J. H., and Larson, R. G. (2007) Single-molecule analysis of 1D diffusion and transcription elongation of T7 RNA polymerase along individual stretched DNA molecules. *Nucleic Acids Res.* 35, 3848–3858.
- (18) Skinner, G. M., Baumann, C. G., Quinn, D. M., Molloy, J. E., and Hoggett, J. G. (2004) Promoter binding, initiation, and elongation by bacteriophage T7 RNA polymerase. A single-molecule view of the transcription cycle. *J. Biol. Chem.* 279, 3239–3244.
- (19) Borukhov, S., Polyakov, A., Nikiforov, V., and Goldfarb, A. (1992) GreA protein: a transcription elongation factor from Escherichia coli. *Proc Natl Acad Sci USA* 89, 8899–8902.
- (20) Laptenko, O., Lee, J., Lomakin, I., and Borukhov, S. (2003) Transcript cleavage factors GreA and GreB act as transient catalytic components of RNA polymerase. *The EMBO Journal* 22, 6322–6334.
- (21) Yuzenkova, Y., Gamba, P., Herber, M., Attaiech, L., Shafeeq, S., Kuipers, O. P., Klumpp, S., Zenkin, N., and Veening, J. W. (2014) Control of transcription elongation by GreA determines rate of gene expression in Streptococcus pneumoniae. *Nucleic Acids Res.* 42, 10987–10999.
- (22) Hsu, L. M., Vo, N. V., and Chamberlin, M. J. (1995) Escherichia coli transcript cleavage factors GreA and GreB stimulate promoter escape and gene expression in vivo and in vitro. *Proc Natl Acad Sci USA* 92, 11588–11592.
- (23) Niederholtmeyer, H., Xu, L., and Maerkl, S. J. (2012) Real-Time mRNA Measurement during an in Vitro Transcription and Translation Reaction Using Binary Probes. *ACS Synth. Biol.* 2, 411–417.
- (24) Kelly, J. R., Rubin, A. J., Davis, J. H., Ajo-Franklin, C. M., Cumbers, J., Czar, M. J., de Mora, K., Gliberman, A. L., Monie, D. D., and Endy, D. (2009) Measuring the activity of BioBrick promoters using an in vivo reference standard. *J. Biol. Eng.* 3, 4.
- (25) Chappell, J., Jensen, K., and Freemont, P. S. (2013) Validation of an entirely in vitro approach for rapid prototyping of DNA regulatory elements for synthetic biology. *Nucleic Acids Res.* 41, 3471–3481.
- (26) Sun, Z. Z., Yeung, E., Hayes, C. A., Noireaux, V., and Murray, R. M. (2013) Linear DNA for rapid prototyping of synthetic biological circuits in an Escherichia coli based TX-TL cell-free system. *ACS Synth. Biol.* 3, 387–397.
- (27) Davis, J. H., Rubin, A. J., and Sauer, R. T. (2011) Design, construction and characterization of a set of insulated bacterial promoters. *Nucleic Acids Res.* 39, 1131–1141.
- (28) Stanton, B. C., Nielsen, A. A. K., Tamsir, A., Clancy, K., Peterson, T., and Voigt, C. A. (2014) Genomic mining of prokaryotic repressors for orthogonal logic gates. *Nature Chemical Biology* 10, 99–105.
- (29) Chilcott, G. S., and Hughes, K. T. (2000) Coupling of flagellar gene expression to flagellar assembly in Salmonella enterica serovar typhimurium and Escherichia coli. *Microbiol. Mol. Biol. Rev.* 64, 694–708.
- (30) Kalir, S., McClure, J., Pabbaraju, K., Southward, C., Ronen, M., Leibler, S., Surette, M. G., and Alon, U. (2001) Ordering genes in a flagella pathway by analysis of expression kinetics from living bacteria. *Science* 292, 2080–2083.
- (31) Liu, X., and Matsumura, P. (1996) Differential regulation of multiple overlapping promoters in flagellar class II operons in Escherichia coli. *Molecular Microbiology* 21, 613–620.
- (32) Kalir, S., and Alon, U. (2004) Using a Quantitative Blueprint to Reprogram the Dynamics of the Flagella Gene Network. *Cell* 117, 713–720.

- (33) Liu, X., and Matsumura, P. (1994) The FlhD/FlhC complex, a transcriptional activator of the Escherichia coli flagellar class II operons. *J Bacteriol* 176, 7345–7351.
- (34) Kundu, T. K., Kusano, S., and Ishihama, A. (1997) Promoter selectivity of Escherichia coli RNA polymerase sigmaF holoenzyme involved in transcription of flagellar and chemotaxis genes. *J Bacteriol* 179, 4264–4269.
- (35) Stafford, G. P. (2005) Binding and transcriptional activation of non-flagellar genes by the Escherichia coli flagellar master regulator FlhD2C2. *Microbiology* 151, 1779–1788.
- (36) Keseler, I. M., Mackie, A., Peralta-Gil, M., Santos-Zavaleta, A., Gama-Castro, S., Bonavides-Martinez, C., Fulcher, C., Huerta, A. M., Kothari, A., Krummenacker, M., Latendresse, M., Muniz-Rascado, L., Ong, Q., Paley, S., Schroder, I., Shearer, A. G., Subhraveti, P., Travers, M., Weerasinghe, D., Weiss, V., Collado-Vides, J., Gunsalus, R. P., Paulsen, I., and Karp, P. D. (2012) EcoCyc: fusing model organism databases with systems biology. *Nucleic Acids Res.* 41, D605–D612.
- (37) Müller, V., Jones, C. J., Kawagishi, I., Aizawa, S., and Macnab, R. M. (1992) Characterization of the fliE genes of Escherichia coli and Salmonella typhimurium and identification of the FliE protein as a component of the flagellar hook-basal body complex. *J Bacteriol* 174, 2298–2304.
- (38) Kutsukake, K., and Ide, N. (1995) Transcriptional analysis of the flgK and fliD operons of Salmonella typhimurium which encode flagellar hook-associated proteins. *Mol. Gen. Genet.* 247, 275–281.
- (39) Park, K., Choi, S., Ko, M., and Park, C. (2001) Novel sigmaF-dependent genes of Escherichia coli found using a specified promoter consensus. *FEMS Microbiol. Lett.* 202, 243–250.
- (40) Cox, R. S., Surette, M. G., and Elowitz, M. B. (2007) Programming gene expression with combinatorial promoters. *Mol Syst Biol* 3, 1–11.
- (41) Sun, Z. Z., Hayes, C. A., Shin, J., Caschera, F., Murray, R. M., and Noireaux, V. (2013) Protocols for implementing an Escherichia coli based TX-TL cell-free expression system for synthetic biology. *J Vis Exp* e50762.
- (42) Svetlov, V., and Artsimovitch, I. (2015) Purification of Bacterial RNA Polymerase: Tools and Protocols, in, pp 13–29. Springer New York, New York, NY.
- (43) Marr, M. T., and Roberts, J. W. (1997) Promoter recognition as measured by binding of polymerase to nontemplate strand oligonucleotide. *Science* 276, 1258–1260.
- (44) Perederina, A. A., Vassilyeva, M. N., Berezin, I. A., Svetlov, V., Artsimovitch, I., and Vassilyev, D. G. (2006) Cloning, expression, purification, crystallization and initial crystallographic analysis of transcription elongation factors GreB from Escherichia coli and Gfh1 from Thermus thermophilus. *Acta Crystallogr F Struct Biol Cryst Commun* 62, 44–46.

**Figure 1:**

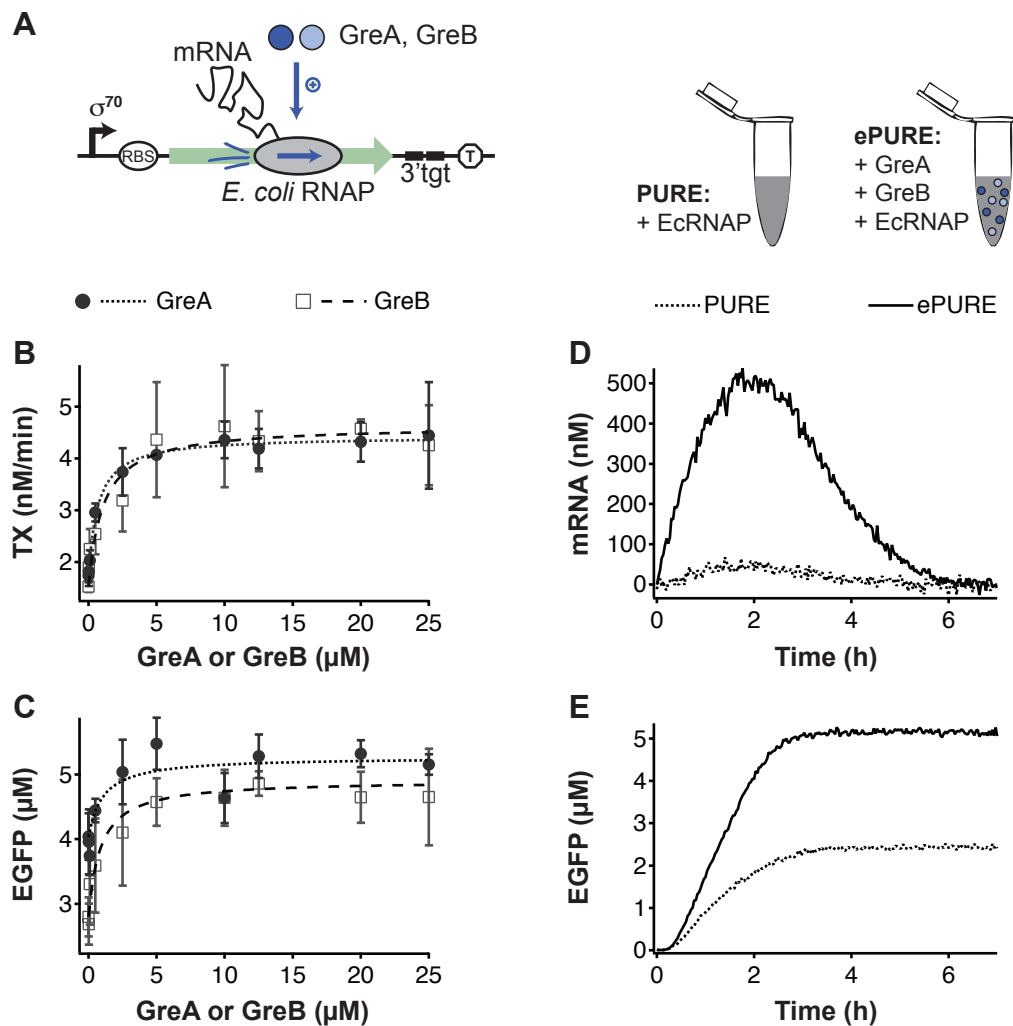

**Fig. 1: GreA and GreB transcription elongation factors increase EcRNAP transcription rates in a PURE TX-TL reaction.**

(A) GreA and GreB proteins enhance transcription of a DNA templates by EcRNAP in a PURE TX-TL reaction. The DNA template encoded EGFP under control of a consensus sequence  $\sigma^{70}$  promoter and a strong ribosomal binding site (RBS). Upstream of a transcriptional terminator it carried target region (3' tgt) to measure the concentration of full-length mRNA using binary FRET probes. Transcription rates (B) and final EGFP concentrations (C) increase with increasing GreA and GreB concentrations following hyperbolic kinetics. Lines represent fits to the Michaelis-Menten equation. All GreA and GreB concentrations were tested at least in duplicate. (D, E) Measurements of mRNA and EGFP concentrations over time during a TX-TL reaction in PURE and ePURE. Transcription rates and final EGFP concentrations were determined from traces like these as described in the Materials and Methods section. DNA templates carried the  $\sigma^{70}$  tet promoter and was used at a concentration of 8 nM.

**Figure 2:**

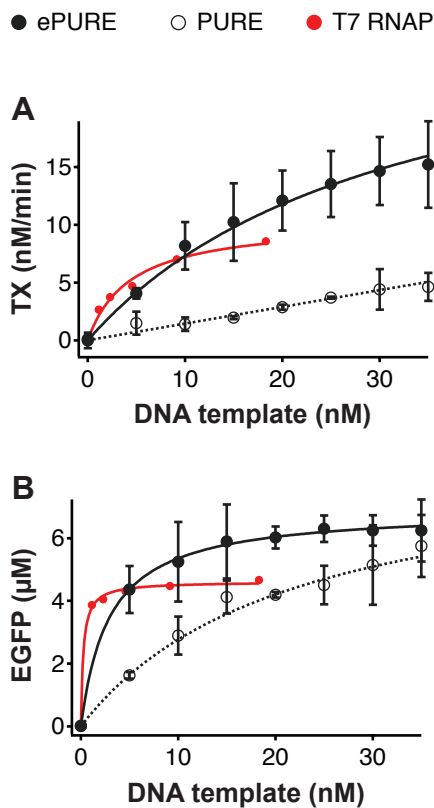

**Fig. 2: Enhanced transcription in the ePURE system as a function of DNA template concentration.**

Effect of varying DNA template concentrations on transcription rates (**A**) and final EGFP concentration (**B**). The DNA template carried the  $\sigma^{70}_{tet}$  promoter and DNA concentrations were tested in two independent experiments. Data for comparison to the T7 RNAP was previously collected in a PURE reaction without EcRNAP and GreA and GreB proteins<sup>23</sup>. Lines represent fits to the Michaelis-Menten equation.

**Figure 3:**

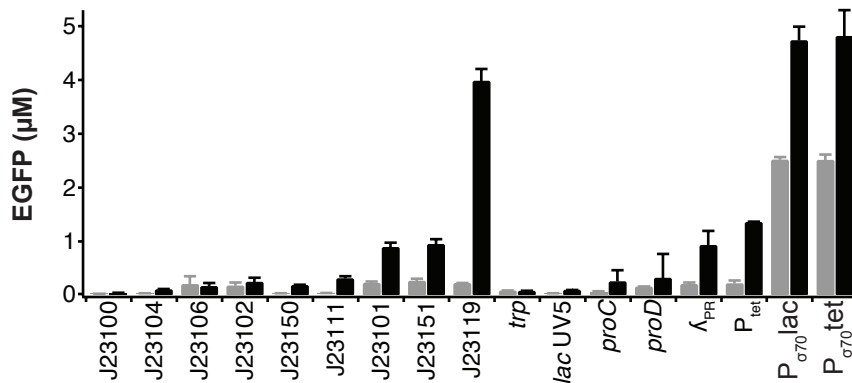

**Fig. 3: Enhanced synthesis from different  $\sigma 70$  EcrNAP promoters in the ePURE system.** Comparison of final EGFP produced from different  $\sigma 70$  EcrNAP promoters in the PURE and the ePURE system. DNA templates were at a concentration of 8 nM and encoded EGFP. Values are averages of two independent experiments with error bars showing the standard deviation.

**Figure 4:**

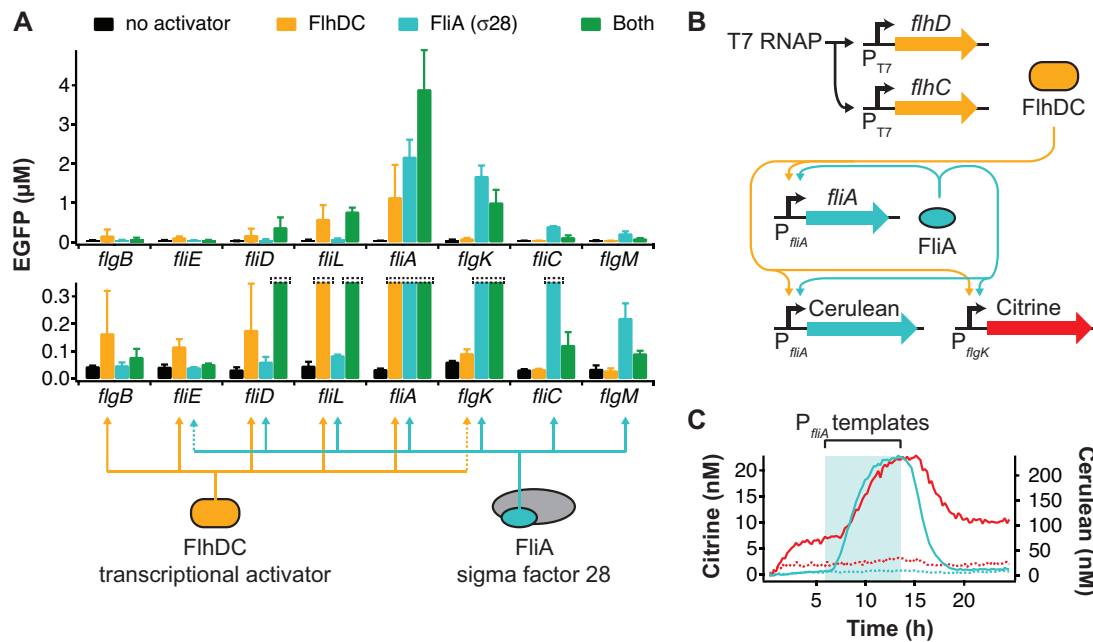

**Fig. 4: *E. coli* flagellar promoter activation by FlhDC and  $\sigma 28$  factor in ePURE.**

(A) Addition of pre-synthesized FlhDC and  $\sigma 28$  to an ePURE reaction activated EGFP expression from eight native *E. coli* promoters involved in flagella synthesis. The activators were added separately or in combination. The activation pattern expected from annotations on EcoCyc is shown beneath the experimental results. Dotted lines represent deviations of our results from the expectation and are discussed in the text. All promoter-EGFP templates were used at 6.5nM. Values are averages of two independent experiments with error bars showing the standard deviation. (B) A 5-gene genetic network built from FlhDC and  $\sigma 28$  activators and two native flagellar promoters control expression of Citrine and Cerulean reporters. (C) The flagella gene network was characterized in a microfluidic nano-reactor device in a continuous ePURE reaction. The  $P_{fliA}$ -*fliA* and  $P_{fliA}$ -Cerulean templates were added transiently during the shaded region of the plot. Solid lines are Cerulean (cyan) and Citrine (red) concentrations for the full network, dotted lines represent a control experiment omitting the  $P_{T7}$ -*flhD* and  $P_{T7}$ -*flhC* templates. The figure shows a representative result of two experiments.
